# Supplementary material
Source: publisher figshare collection journal article supplement (https://acs.figshare.com/ndownloader/files/3713680)
Supplement: Supplementary file 1 [file 3713680]

**An isoxazole small molecule drives metabolic and gene expression changes to decrease proliferation and promote a neuroendocrine phenotype in islet cells.**

Michael A. Kalwat<sup>1</sup>, Zhimin Huang<sup>1,2</sup>, Chonlarat Wichaidit<sup>1</sup>, Kathleen McGlynn<sup>1</sup>, Svetlana Earnest<sup>1</sup>, Claudia Savoia<sup>3</sup>, Elhadji M. Dioum<sup>3</sup>, Jay W. Schneider<sup>4</sup>, Michele R. Hutchison<sup>5,6</sup>, and  
Melanie H. Cobb<sup>1</sup>

Departments of <sup>1</sup>Pharmacology, <sup>4</sup>Internal Medicine and <sup>5</sup>Pediatrics, UT Southwestern Medical  
Center, Dallas, TX 75235, USA;

<sup>3</sup>Nestle Institute of Health Sciences, Lausanne, Switzerland;

<sup>2</sup>UT Southwestern Visiting Scholar; permanent address: Department of Endocrinology and  
Diabetes Center, First Affiliated Hospital of Sun Yat-sen University, Guangzhou, Guangdong,  
China;

<sup>6</sup>Current address: Department of Pediatrics, Medical University of South Carolina, Charleston,  
SC 29425, USA

\*Correspondence: [melanie.cobb@utsouthwestern.edu](mailto:melanie.cobb@utsouthwestern.edu)

## Supporting Information

### Figure Legends

#### **Figure S1. ISX induces acetylation of histones in multiple beta cell lines.**

(A) ISX (20  $\mu$ M) induces H3 and H4 acetylation in human beta cell line 1.1B4.

(B) ISX (20  $\mu$ M) induces H3 acetylation in rat INS1 beta cells.

(C) GSEA of microarray data shows enrichment in genes for neuronal, beta cell, fatty acid, and cell cycle regulation. NES, normalized enrichment score.

(D) MIN6 cells were treated with PD0325901 (500nM), nifedipine (10  $\mu$ M), BAPTA-AM (100  $\mu$ M), cycloheximide (50  $\mu$ g/ml), or compound C (10  $\mu$ M) in the presence or absence of ISX (20  $\mu$ M) for 6 hours and STMN2 expression was monitored by qPCR. Data are shown as the average and SEM of more than three independent experiments. \*,  $P < 0.05$ .

Related to Figure 1.

(E) MIN6 cells treated with ISX (20  $\mu$ M) for 0, 1, 6, or 24 hours. Total AMP kinase and phosphorylated Thr-174 AMP kinase were immunoblotted. Bar graph shows the average and SEM of three independent experiments.

**Table S1.** Human Islet Donor Information, Related to Figure 1.

**Table S2.** ISX microarray and beta cell-enriched/T2D-implicated genes. Related to Figure 1.

**Table S3.** Metabolomic analysis of ISX-treated MIN6 cells. Related to Figure 3.

## Supporting Information

### Methods

#### *Metabolomic analysis*

Three separate passages of MIN6 cells in 6-well dishes were incubated in either high (25 mM)

or low glucose (5 mM) complete MIN6 medium with either DMSO (0.1%) or ISX (10  $\mu$ M) for two days. Cells were then washed with 1 ml ice cold saline and harvested in 1 ml of 80% methanol at -80°C. Cells were scraped and transferred to 1.5 ml tubes for three freeze thaw cycles in liquid nitrogen. Lysates were clarified at 14,000 rpm for 15 min at 4° C. Metabolite-containing supernatants were transferred to a new 1.5 ml tube and lyophilized using a SpeedVac. Breathable membranes were placed on top of the open tubes to prevent cross contamination and the SpeedVac was operated without heat for 4 h. Pellets were stored at -80° C prior to analysis by the Metabolomics Facility at Children's Medical Center Research Institute at UT Southwestern (Dallas, TX). Metabolites were reconstituted in 100  $\mu$ l of 0.03% formic acid in analytical-grade water, vortex-mixed, and centrifuged to remove debris. Thereafter, the supernatant was transferred to a high-performance liquid chromatography (HPLC) vial for the metabolomics study. Targeted metabolite profiling was performed using a liquid chromatography-mass spectrometry/mass spectrometry (LC/MS/MS) approach. Separation was achieved on a Phenomenex Synergi Polar-RP HPLC column (150  $\times$  2 mm, 4  $\mu$ m, 80 Å) using a Nexera Ultra High Performance Liquid Chromatograph (UHPLC) system (Shimadzu Corporation). The mobile phases employed were 0.03% formic acid in water (A) and 0.03% formic acid in acetonitrile (B). The gradient program was as follows: 0-3 min, 100% A; 3-15 min, 100% - 0% A; 15-21 min, 0% A; 21-21.1 min, 0% - 100% A; 21.1-30 min, 100% A. The column was maintained at 35°C and the samples kept in the autosampler at 4°C. The flow rate was 0.5 ml/min, and injection volume 10  $\mu$ l. The mass spectrometer was an AB QTRAP 5500 (Applied Biosystems SCIEX) with electrospray ionization (ESI) source in multiple reaction monitoring (MRM) mode. Sample analysis was performed in positive/negative switching mode. Declustering potential (DP) and collision energy (CE) were optimized for each metabolite by direct infusion of reference standards using a syringe pump prior to sample analysis. The MRM MS/MS detector conditions were set as follows: curtain gas 30 psi; ion spray voltages 5000 V

(positive) and -1500 V (negative); temperature 650°C; ion source gas 1 50 psi; ion source gas 2 50 psi; interface heater on; entrance potential 10 V. Dwell time for each transition was set at 3 msec. Samples were analyzed in a randomized order, and MRM data was acquired using Analyst 1.6.1 software (Applied Biosystems SCIEX).

Chromatogram review and peak area integration were performed using MultiQuant software version 2.1 (Applied Biosystems SCIEX). Although the numbers of cells were very similar and each sample was processed identically and randomly, the peak area for each detected metabolite was normalized against the protein content of that sample to correct any variations introduced from sample handling through instrument analysis. The normalized area values were used as variables for the multivariate and univariate statistical data analysis. The chromatographically co-eluted metabolites with shared MRM transitions were shown in a grouped format, i.e., leucine/isoleucine. Principle component analysis (PCA) was completed using SIMCA-P software (version 13.0.1, Umetrics).

#### *ISX time course and mRNA stability in MIN6*

MIN6 cells were grown in 12 well culture dishes to ~80% confluence in normal media. For ISX treatments, media was changed to either ISX- or DMSO-containing low glucose MIN6 media (Dulbecco's modified Eagle's medium (5.5 mM glucose), supplemented with 15% fetal bovine serum, 100 units ml<sup>-1</sup> penicillin, 100 g ml<sup>-1</sup> streptomycin, 292 µg ml<sup>-1</sup> L glutamine, and 50 µM β-mercaptoethanol) for the indicated times prior to harvest.

#### *Data visualization and analysis*

Line and bar graphs were generated using Graphpad Prism 6. Microarray plot shown in Figure 1A was generated using MatLab. Clustering and heatmap generation for metabolomic data along with the volcano plots shown in Figure 3 were completed using MatLab. Code for analysis

is available upon request. Gene set enrichment analyses (GSEA) were run using software freely obtained from the Broad Institute. For metabolomics data, all values are normalized to the mean of the DMSO low glucose control. Hierarchical clustering was performed on the normalized matrix using MATLAB function, clustergram (Figure 3A). For each pair of treatments (Figures 3B-E), Student's t-test was used to determine a p-value for each metabolite, and subsequently was adjusted using Benjamini and Yekutieli's FDR controlling procedure <sup>1</sup>. The fold change cut-off for all comparisons was chosen at 1.3-fold due to a narrow dynamic range of ISX treatment compared to DMSO under high glucose treatment (Figure 3D).

## Supporting References

1. Yekutieli, D. and Benjamini, Y. (1999) Resampling-based false discovery rate controlling multiple test procedures for multiple testing procedures., *J. Stat. Plan. Inf.* 82, 171-196.
2. Williams, M.J., Almen, M.S., Fredriksson, R., and Schioth, H.B. (2012) What model organisms and interactomics can reveal about the genetics of human obesity, *Cell Mol Life Sci* 69, 3819-3834.

Table of qPCR primers used:

| Target Gene                        | Species     | Sequence 5'-3'                                        |
|------------------------------------|-------------|-------------------------------------------------------|
| ACTB                               | Human/Mouse | AGGTCATCACTATTGGCAACGA<br>CACTTCATGATGGAATTGAATGTAGTT |
| INS (exon2)                        | Human       | TGTCCTTCTGCCATGGCCCT<br>TTCACAAAGGCTGCGGCTGG          |
| NeuroD1                            | Human       | ATGACCAAATCGTACAGCGAG<br>GTTTCATGGCTTCGAGGTCGT        |
| Glucagon                           | Human       | CTGAAGGGACCTTTACCAGTGA<br>CCTGGCGGCAAGATTATCAAG       |
| MafA                               | Human/Mouse | CTTCAGCAAGGAGGAGGTCATC<br>CTCGTATTTCTCCTTGTACAGGTCC   |
| Glucokinase (variant 1, beta cell) | Human       | TGTGACTGAACCTCAAACCCC                                 |

|         |       |                                                                         |
|---------|-------|-------------------------------------------------------------------------|
| SLC27A2 | Human | TCCATCCTGGCTCTGTCGTC<br>TACTCTTGCCTTGCGGACTAA<br>CCGAAGCAGTTCACCGATATAC |
| ENPP5   | Human | TAAAGTTCCAACGCCCCATTT<br>GCAAAGAGGCCAGTTACCAAAG                         |
| STMN2   | Human | GCTCTTGCTTTTACCCGGAAC<br>AGGCACGTTTGTTGATTTGCT                          |
| VAT1L   | Human | AAGATCCGCGTCAAAGCCTG<br>GAGCTTCAACAATCCCAGAACA                          |
| GPR160  | Human | CCAGCCATCTACCAAAGCCTG<br>GCCAGTAACTCTGAATGCTGACA                        |
| INA     | Human | CGCCACCTTCGGGAATACC<br>GTGCTAAAACGTGTCTCCTCG                            |
| FAM105A | Human | GTGACCAAGTTCACTCCTGGA<br>CCAACATCACAAAGCCTTTTGC                         |
| RGS9    | Human | CCCTGGATCACCGATGACAC<br>CGTTCCACTCGCATCTTGTTT                           |
| SLC39A8 | Human | TTCCCCACGAGTTAGGAGACT<br>TTGTTGCCACCAAATGCC                             |
| PCSK1   | Human | TCGCGCCTCCTAGCTCTTCGCA<br>GCAGACTCCAGGCTCTTCGCTC                        |
| CLU     | Human | CCAATCAGGGAAGTAAGTACGTC<br>CTTGCGCTCTTCGTTTGTTTT                        |
| NEGR1   | Human | GCTTGTTGCTCGAACCAGTG<br>CCCCTTTTCTGACCATCATGTT                          |
| SLC6A6  | Human | GGAGAAGTGGTCTAGCAAGATCG<br>AGAAACGCACCTCCACCATTG                        |
| NTRK2   | Human | GCAATCCATTTACATGCTCCTGT<br>CATATTAGGAACCGGATCACCTG                      |
| FGF19   | Human | CGGAGGAAGACTGTGCTTTCG<br>CTCGGATCGGTACACATTGTAG                         |
| SCD5    | Human | TGCGACGCCAAGGAAGAAAT<br>CCTCCAGACGATGTTCTGCC                            |
| MAFB    | Human | GACGCAGCTCATTCAGCAG<br>CTCGCACTTGACCTTGTAGGC                            |
| PDX1    | Human | ATAAGAGGACCCGTACAGCTT<br>CTCCGTCAAGTTGAGCATCAC                          |
| ENTPD3  | Human | GCTGCGTGAGACTGAGAGTT<br>CTTGAGGCCTGCTTGCTCAC                            |
| CDK1    | Human | GGATGTGCTTATGCAGGATTCC<br>CATGTACTGACCAGGAGGGATAG                       |

|           |       |                                                    |
|-----------|-------|----------------------------------------------------|
| CCL11     | Human | CCCCTTCAGCGACTAGAGAG<br>TCTTGGGGTCGGCACAGAT        |
| TOP2A     | Human | TGGCTGTGGTATTGTAGAAAGC<br>TTGGCATCATCGAGTTTGGGA    |
| ARHGAP11A | Human | CTGCATCCTGCCTCAGAGAG<br>TTTTACCCCCTATTTCCGTGGC     |
| KIF11     | Human | AGCAAGCTGCTTAACACAGTT<br>CCTTCTTACGATCCAGTTTGGAA   |
| PLK4      | Human | TTCTCGATACCTTCGTAGAGCTT<br>CTGAGTGACATCGTTCCATTGT  |
| CDC25C    | Human | TCTACGGAACCTTTCTCATCCAC<br>TCCAGGAGCAGGTTTAACATTTT |
| INSI/II   | Mouse | TGAAGTGGAGGACCCACAAGT<br>AGATGCTGGTGCAGCACTGAT     |
| TOP2A     | Mouse | CAACTGGAACATATACTGCTCCG<br>GGGTCCCTTTGTTTGTTATCAGC |
| MYC       | Mouse | ATGCCCCTCAACGTGAACTTC<br>GTCGCAGATGAAATAGGGCTG     |
| DUSP1     | Mouse | GTTGTTGGATTGTCGCTCCTT<br>TTGGGCACGATATGCTCCAG      |
| STMN2     | Mouse | CAGAGGAGCGAAGAAAGTCTCA<br>CTAGATTAGCCTCACGGTTTTCC  |
